# Supplementary material
Source: Springer Nature journal article supplement (https://www.springermedizin.de/resource/supplementary/12885_2012_4085_MOESM3_ESM.pdf/9465266)

1 2 3 4 5 6

602bp →

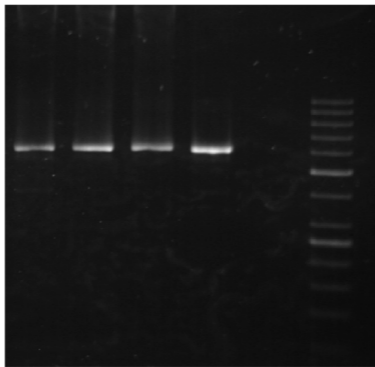

600bp

500bp

250bp

150bp

Supplement: MOESM3 [file 9465266]
